# Supplementary material
Source: MDPI journal article supplement (https://www.mdpi.com/2413-8851/7/2/64)
Supplement: s1 [file s1]

## Supplementary Material

Table S1. List of all variables used within the analysis, and their description

| Var Name       | Description                                                                                                                          |
|----------------|--------------------------------------------------------------------------------------------------------------------------------------|
| code           | LSOA code                                                                                                                            |
| NDVI           | Normalised Difference Vegetation Index – indication of passive greenspace, from CDRC dataset “Access to Healthy Assets & Hazards”    |
| Blue_Dist      | Distance to closest bluespace – from CDRC dataset “Access to Healthy Assets & Hazards”                                               |
| GSAP_dist      | Distance to closest greenspace access point                                                                                          |
| GS_prox_func   | Function of closest GS: Play Space, Playing Field, or Public Park Or Garden                                                          |
| GS_area        | The size of closest greenspace (m <sup>2</sup> )                                                                                     |
| RSE_dist       | Distance to nearest railway (m)                                                                                                      |
| TM_dist        | Distance to nearest tram or metro stop (m)                                                                                           |
| MWJ_dist       | Distance to nearest motorway junction (m)                                                                                            |
| BS_dist        | Distance to nearest bus station (m)                                                                                                  |
| RUC1           | RUC 2011 assignment                                                                                                                  |
| NumATL_1mile   | No. of any transport link of those above within a mile                                                                               |
| NumATL_2.5mile | No. of any transport link of those above within 2.5 miles                                                                            |
| NumATL_5mile   | No. of any transport link of those above within 5miles                                                                               |
| ATL_dist       | Distance to nearest transport link of any kind                                                                                       |
| NumGS          | Number of GS within 500m                                                                                                             |
| period         | period of gentrification - where no gentrification was identified, the period and associated data (CVA and DP) are randomly assigned |
| Angle          | CVA angle                                                                                                                            |
| Magnitude      | CVA magnitude                                                                                                                        |
| CHURN          | Data Primitive change                                                                                                                |
| ETH            | Data Primitive change                                                                                                                |
| PROF2POP       | Data Primitive change                                                                                                                |
| HP             | Data Primitive change                                                                                                                |
| GT             | GT score from process function for the period stated                                                                                 |
| start          | Start year of gentrification                                                                                                         |
| peak           | Peak year of gentrification                                                                                                          |
| start2peak     | Number of years from start to peak gentrification                                                                                    |
| end            | End year of gentrification                                                                                                           |
| cum.val        | Cumulative GT score (within the                                                                                                      |
| duration       | Duration of gentrification                                                                                                           |
| peak2end       | Number of years from peak to end gentrification                                                                                      |
| X2010.2011     | The sum of the changes within this period                                                                                            |
| ...            | x45 of these variables relating to each unique combination of time periods in 2010-2019 study period                                 |
| G_count        | Number of times the gentrification criteria has been met throughout the 45 different time periods                                    |
| Gent           | Presence of gentrification, “Gentrification” or “None”                                                                               |
| Type           | Type of gentrification if present or “None”, “Residential”, “Rural”, “Transport”                                                     |

Figure S1: Interactive map of the predicted gentrification in England

<https://uni-of-leeds.maps.arcgis.com/apps/instant/basic/index.html?appid=99671dafa1ba4650814c31ee1159a050&locale=en>

This is a link to an interactive map of the predicted gentrification in England. You can explore the predicted type, and their associated temporal properties including the start, peak, and end years of gentrification, and the number of years from start to peak, and number of years from peak to end of the gentrification.
